# Supplementary material
Source: PubMed Central journal article supplement (PMC1449893)

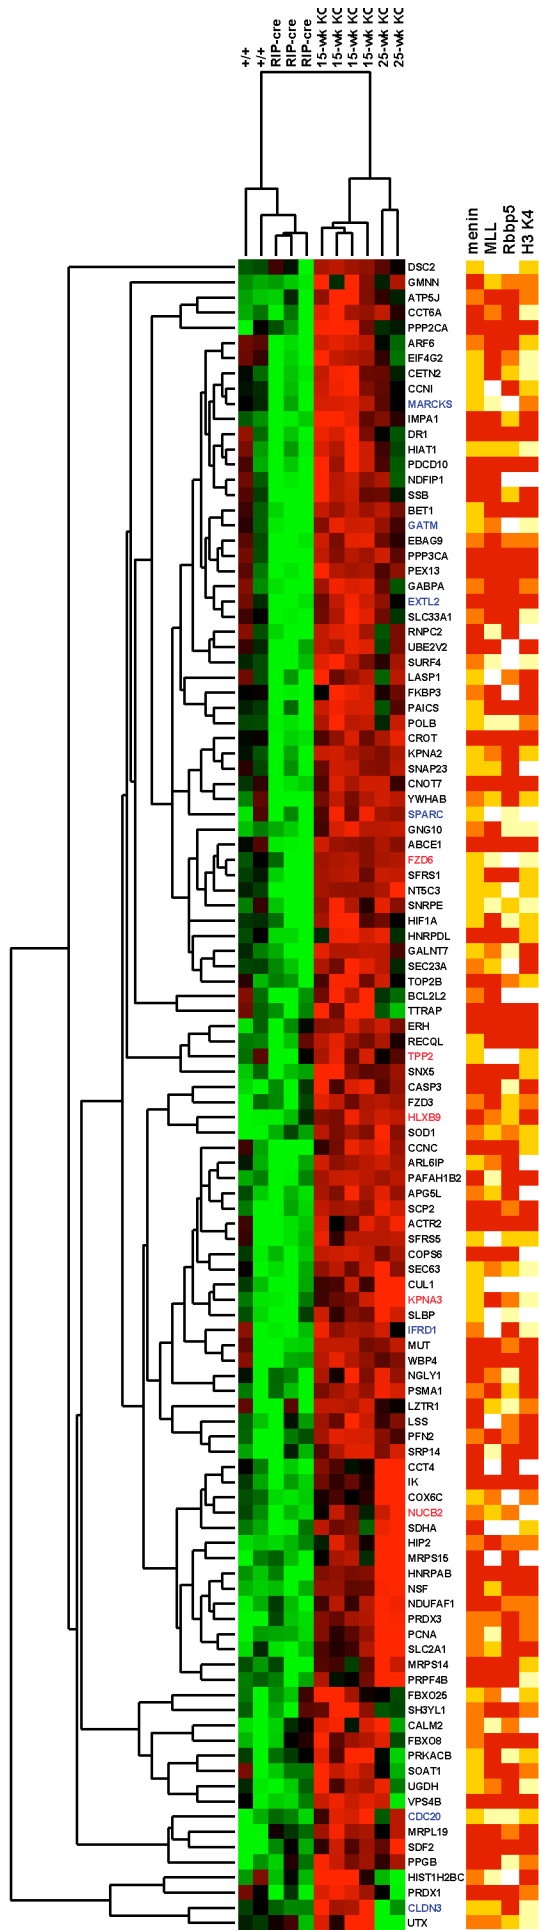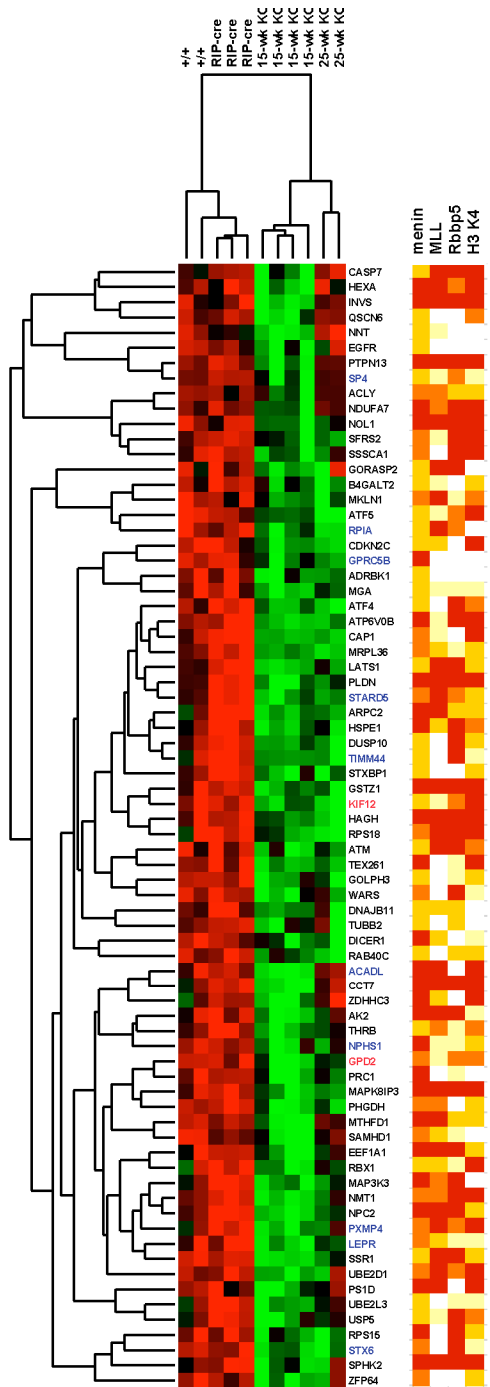

Supplement: pgen.0020051.sg001.pdf [file pgen.0020051.sg001.pdf]
